# Supplementary material
Source: HighWire-hosted journal article supplement (http://www.ajnr.org/highwire/filestream/52256/field_highwire_adjunct_files/0/1419_table.pdf)
Supplement: 1419_table.pdf [file 1419_table.pdf]

**On-line Table 1: Complications of Onyx embolization in 9 of 40 patients with DAVFs**

| Patient No. | Age/ Sex | Cognard Type | Suppliers                              | Venous Drainage             | Treatment       |          | Angiographic Results        | Complications                                                                     | Mechanism                    | Follow-up (months) | Clinical Outcome (mRS)                                                                                 |
|-------------|----------|--------------|----------------------------------------|-----------------------------|-----------------|----------|-----------------------------|-----------------------------------------------------------------------------------|------------------------------|--------------------|--------------------------------------------------------------------------------------------------------|
|             |          |              |                                        |                             | Strategy        | Access   |                             |                                                                                   |                              |                    |                                                                                                        |
| 1           | 28/M     | I            | MMA(L), OA(L), PAA(L)                  | TSS                         | TAE             | MMA      | Incomplete                  | None                                                                              | Cardiopulmonary embolization | 10                 | mRS = 0                                                                                                |
| 2           | 50/F     | Ila          | PMA(R), PAA(R), STA(R), MMA(R), MHT(R) | IPV, SOV                    | TAE             | MMA      | Incomplete                  | Reflexive bradyarrhythmia, hemifacial hypoesthesia, hemifacial, palsy             | TCR, arterial embolism       | 10                 | mRS = 1, mild hemifacial palsy; hemifacial hypoesthesia resolved within 2 months                       |
| 3           | 53/M     | Ila          | MMA(B), AMA(B), MHT(L)                 | SOV(B)                      | TAE             | MMA      | Complete                    | Hemifacial hypoesthesia                                                           | Arterial embolism            | 9                  | mRS = 0                                                                                                |
| 4           | 60/F     | Ila          | MMA(R), OAR(R), MHT(R)                 | TSS                         | TAE             | MMA      | Complete                    | Hallucination                                                                     | Venous restriction           | 1                  | mRS = 0                                                                                                |
| 5           | 60/M     | IV           | MMA(B), MHT(L), OA(L), SCA(L)          | BVR, dilated                | TAE(I), TAE(II) | MMA, SCA | Incomplete(I), Complete(II) | None, vertigo, diplopia, blepharoptosis, ataxia, hemihypoesthesia, gustatory loss | Arterial embolism            | 14                 | mRS = 1, diplopia, blepharoptosis, hemihypoesthesia, gustatory loss, mild ataxia                       |
| 6           | 23/M     | IV           | MMA(L), MHT(L)                         | BVR, varix                  | TAE             | MMA      | Complete                    | None                                                                              | Catheter gluing              | 10                 | mRS = 0                                                                                                |
| 7           | 42/M     | IV           | MMA(R), MHT(R), SCA(R)                 | Cerebellar veins, PV, varix | TAE             | MMA      | Incomplete                  | Reflexive bradyarrhythmia, hemifacial hypoesthesia, hemifacial palsy              | TCR, arterial embolism       | 10                 | mRS = 0, hemifacial hypoesthesia, resolved within 2 months; hemifacial palsy, resolved within 3 months |
| 8           | 41/M     | IV           | PCA(L), PMAL)                          | BVR, dilated                | TAE             | PCA      | Complete                    | Blepharoptosis, diplopia, mild ataxial(L)                                         | Arterial embolism            | 3                  | mRS = 1, diplopia, blepharoptosis                                                                      |
| 9           | 47/M     | V            | MMA(R), MHT(R), PAA(R), OAR)           | BVR, varix, CV, SW          | TAE             | MMA      | Incomplete                  | Reflexive bradyarrhythmia                                                         | TCR                          | 1                  | mRS = 0                                                                                                |

**Note:**—M, indicates male; F, female; BVR, basal vein of Rosenthal; MMA, middle meningeal artery branches; MHT, meningohypophyseal trunk branches; OA, occipital artery; PMA, posterior meningeal artery; SCA, superior cerebellar artery; TAE, transarterial embolization; SOV, superior ophthalmic vein; CV, cortical veins; IPV, inferior petrosal vein; SVV, superior vermiform vein; I, first stage; II, second stage; TCR, trigeminocardiac reflex; mRS, modified Rankin Scale; L, left; R, right; PAA, posterior auricular artery; STA, superficial temporal artery; AMA, anterior meningeal artery; TSS, transverse-sigmoid sinus; B, bilateral; PV, petrosal vein.
